# Supplementary material for: USP28 enables oncogenic transformation of respiratory cells, and its inhibition potentiates molecular therapy targeting mutant EGFR, BRAF and PI3K
Source: PubMed Central journal article supplement (PMC9441007; doi:10.1002/1878-0261.13217), 2022-04-30

## Supplementary Figure Legends

### Figure S1: *USP28 is upregulated irrespective of lung tumour subtype*

- A) Publicly available data of relative mRNA expression of USP28 in human NSCLC Adenocarcinoma samples, separated by subclass. Shown are non-transformed and tumour samples. N = normal lung tissue, T = tumour. n indicates number of individual samples. Generated with the open-source tool [www.gepia2.cancer-pku.cn](http://www.gepia2.cancer-pku.cn). p-values were calculated using two-tailed T-test statistical analysis.  $p < 0.005 = ***$ . In box plots, the centre line reflects the median and the upper and lower box limits indicate the first and third quartiles. Whiskers extend  $1.5 \times$  the IQR.
- B) Publicly available data of relative mRNA expression of USP28 in human NSCLC Squamous cell carcinoma samples, separated by subclass. Shown are non-transformed and tumour samples. N = normal lung tissue, T = tumour. n indicates number of individual samples. Generated with the open-source tool [www.gepia2.cancer-pku.cn](http://www.gepia2.cancer-pku.cn). p-values were calculated using two-tailed T-test statistical analysis.  $p < 0.0005 = ****$ . In box plots, the centre line reflects the median and the upper and lower box limits indicate the first and third quartiles. Whiskers extend  $1.5 \times$  the IQR.

### Figure S2: *USP28 is required to establish oncogenic transformation in vivo.*

- A) Overview of genetic alterations within the ERBB, RAS, PI3K and RAF oncogenic families in NSCLC (SCC and ADC). Shown are total percent of genetic alterations within the respective pathway and individual pathway members. N = 501 SCC and n = 515 ADC samples. Data generated with the online tools [www.cbioportal.org](http://www.cbioportal.org).
- B) *Schematic representation of in vivo* CRISPR mediated gene editing to induce deletion of *Trp53* and mutation of *Braf* to *Braf<sup>V600E</sup>* (PB) upon intratracheal instillation of AAV virions, packaged with the pleotropic capsid 2/DJ, into *C57Bl6/J-Rosa26<sup>Sor-CAGG-Cas9-IRES-eGFP</sup>* mice. Animals were sacrificed 4 weeks post infection. n= 3.
- C) Representative images of immuno-histochemical staining against endogenous Usp28, Nkx2-1/Ttf-1 and the proliferative marker PcnA in murine lungs infected with either control virus (WT) or PB. Shown a representative lung, with a low and high magnification of individual areas. Animals were analysed 4 weeks' post-infection n=3

### Figure S3: *USP28 is upregulated during early stages of transformation in the human cell line model system, BEAS-2B.*

- A) Representative brightfield images of BEAS-2B cells propagated as either undifferentiated, stem cell like cells, or upon induction of trans-differentiation, caused by addition of 10%FCS to the growth medium for 3 days.
- B) Representative immunofluorescent images against endogenous USP28 (green) of BEAS-2B cells propagated as either undifferentiated, stem cell like cells, or post

serum-induced trans-differentiation, caused by addition of 10%FCS to the growth medium for 3 days. DAPI served as nuclear marker. n= 3.

C) Representative enlarged brightfield images of experiment shown in Figure 3E.

**Figure S4: Malignant transformation of BEAS-2B<sup>DIF</sup> via EGFR-PI3K-MAP.**

- A) mRNA expression correlation data between USP28 and RAS family members HRAS, K-RAS and NRAS in NSCLC ADC and SCCC, obtained by public available data sets ([www.gepia2.cancer-pku.cn/](http://www.gepia2.cancer-pku.cn/)). Shown is the Spearman correlation efficiency (R).
- B) Graphical visualization of the Spearman's correlation between USP28 and KRAS or NRAS in ADC tumours. Correlation and p-value calculated were calculating using the online tool GEPIA [www.gepia2.cancer-pku.cn/](http://www.gepia2.cancer-pku.cn/).
- C) Schematic overviews of commonly occurring mutations in NSCLC driver oncogenes EGFR, HRAS, BRAF and PIK3CA. Shown are missense (green), truncating mutations (black), in frame mutations (brown) and other genetic alterations (violet). Data was generated using the online tool [www.cbiportal.org](http://www.cbiportal.org).
- D) Immunoblot against EGFR, HRAS, BRAF and PIK3CA oncogenic drivers in BEAS-2B<sup>DIF</sup> or BEAS-2B<sup>DIF</sup> upon retroviral transduction to express the indicated oncogenes EGFR (wild type (WT) and L858R), HRAS (G12D), BRAF (V600E) and PIK3CA (wild type (WT), E545K and H1047R), respectively. ACTIN served as loading control. Representative immunoblot of n=3.
- E) RT-PCR of EGFR, HRAS, BRAF and PIK3CA oncogenic drivers in BEAS-2B<sup>DIF</sup> or BEAS-2B<sup>DIF</sup> upon retroviral transduction to express the indicated oncogenes EGFR (wild type (WT) and L858R), HRAS (G12D), BRAF (V600E) and PIK3CA (wild type (WT), E545K and H1047R), respectively. Shown are log<sub>2</sub> fold change expression data, relative to ACTIN and normalized to the respective expression in BEAS-2B<sup>DIF</sup>. Shown are mean values and standard deviation of n=3

**Figure S5: Oncogenic transformation via EGFR-PI3K-MAPK pathway upregulate USP28.**

- A) Schematic model. c-JUN and c-MYC up-regulate transcription of USP28 (Serra et al. 2014; Diefenbacher et al. 2014).
- B) Immunoblot against USP28, c-MYC, c-JUN in BEAS-2B<sup>DIF</sup> or BEAS-2B<sup>DIF</sup> upon transfection of cDNA encoding c-JUN and c-MYC. VINCULIN served as loading control. Representative immunoblot of n=3.
- C) Immunoblot against endogenous USP28 and its substrates NOTCH1, c-MYC and c-JUN of BEAS-2B<sup>UD</sup>, BEAS-2B<sup>DIF</sup> and BEAS-2B<sup>DIF</sup> upon retroviral transduction to express the indicated oncogenes EGFR (L858R), HRAS (G12D), BRAF (V600E) and PIK3CA (wild type (WT) and H1047R), respectively. VINCULIN or ACTIN served as loading control. Representative immunoblot of n=3.
- D) Overview of the oncogenic pathways and recurring oncogenic drivers involved in the regulation of USP28 expression and abundance. Oncogenic transformation upon activation of EGFR-PI3K-MAPK pathway up-regulates transcription of USP28 via c-MYC/ c-JUN.

- E) Pan-Cancer mRNA expression correlation data between USP28 and AKT2 or BRAF, obtained by public available data sets (Depmap.org). Pearson's correlation between USP28 and AKT2 or BRAF mRNA levels in cancer cell lines from different tumor entities. For graphical visualization, linear regression was included and every dot represent a different cell line. The table indicates the next parameters for different tumor entities: Pearson correlation, slope and p-value for the individual tumour types, relative to AKT2-USP28 and BRAF-USP28. The parameters were calculated by the online tool <https://depmap.org/>.

**Figure S6: Malignant transformation renders tumour cells dependent on USP28.**

- A) Immunofluorescence of USP28 endogenous expression in A549 cells. A549 is a KRAS mutated cell line (KRASG12S). ACTIN and DAPI as control markers.
- B) Immunoblot showing protein abundance of USP28, c-MYC and PCNA in A549 upon lentiviral transduction with either a control or two individual constitutive shRNA targeting USP28. ACTIN served as loading control.
- C) For growth analysis, A549 cells from B) were seeded at equal cell density and counted at day 1, day 3 and day 5. p-values were calculated using two-tailed T-test statistical analysis. Shown are mean values and standard deviation of n=3.
- D) BEAS-2B<sup>ONC</sup> (EGFRL858R, PIK3CA L1047R and BRAFV600E) cultured in the presence of either control solvent (DMSO) or AZ1 for 72 hours at indicated concentrations. Shown are representative DAPI Images of cells 72 hours post culture in the presence of DMSO or AZ1. Calculation of GI50 was performed upon cell quantification of 30-45 20x fields from independent wells in control (DMSO) and AZ1 conditions.

**Figure S7: Inhibition of USP28 via AZ1 'resets' the proteome of oncogenic transduced cells towards a 'non-oncogenic' state and induces pro-apoptotic signatures**

- A) Schematic model explaining the proteomics experiments and analysis performed in this manuscript.
- B) Volcano plots comparing protein abundances in BEAS-2B<sup>DIF</sup> and BEAS-2B<sup>ONC</sup> (EGFRL858R, PIK3CA L1047R and BRAFV600E).
- C) Volcano plots comparing protein abundances in BEAS-2B<sup>ONC</sup> (EGFRL858R, PIK3CA L1047R and BRAFV600E) upon exposure to DMSO or 15  $\mu$ M AZ1 for 72 hours AZ1.
- D) Heatmap of proteins identified in Figure 6B for BEAS-2B<sup>DIF</sup>, BEAS-2B<sup>ONC</sup> (PIK3CA L1047R or BRAFV600E) and BEAS-2B<sup>ONC</sup> (PIK3CA L1047R or BRAFV600E) treated with 15  $\mu$ M AZ1 for 72 hours. Shown are n=3 experiments and data presented as Z score values per row. Red= high Z-score, blue = low Z-score protein abundance.

**Figure S8: USP28 inhibition potentiates targeted molecular therapy**

- A) Schematic model explaining the concept of overall survival (OS), progression free survival/disease (PFS) and post-progression survival (PPS).
- B) Kaplan-Meier plots of NSCLC patient post-progression survival (PPS), relative to USP28 expression for total number of patients, patients at Stage 1 and patients at Stage 2. Data was generated using the online tool [www.kmplot.com](http://www.kmplot.com).
- C) Analysis of publicly available datasets of USP28 mRNA expression and Overall Survival (OS) in NSCLC. Samples were divided in two groups based on USP28 mRNA expression: High USP28 (higher than the median USP28 expression) and Low USP28 (lower than the median USP28 expression). Survival days was determined for both groups. Data was obtained from the online tool <https://xena.ucsc.edu/>. In box plots, the centre line reflects the median and the upper and lower box limits indicate the first and third quartiles. Whiskers extend 1.5× the IQR.
- D) Analysis of publicly available datasets of overall patient survival with regard to either EGFR, KRAS, PIK3CA, BRAF or TP53 wild type or mutant status, stratified against low and high USP28 mRNA expression in NSCLC. N=1047 analysed samples. Samples were divided in two groups based on USP28 mRNA expression: High USP28 (higher than the median USP28 expression) and Low USP28 (lower than the median USP28 expression). Differential survival days were determined for WT and mutant groups, respectively. Data was obtained from the online tool <https://xena.ucsc.edu/>.
- E) Immunoblot showing protein abundance of p-EGFR, p-AKT, P-ERK and ERK in BEAS-2B<sup>ONC</sup> (EGFRL858R, PIK3CA L1047R and BRAFV600E) upon exposure to DMSO or 20 µM Gefitinib/ 20 µM Vemurafenib/ 1 µM Buparlisib for 72 hours. VINCULIN serves as loading control. n=3
- F) BEAS-2B<sup>ONC</sup> (EGFRL858R, PIK3CA L1047R and BRAFV600E) cultured in the presence of either control solvent (DMSO), 7.5 µM AZ1 or 10 µM Gefitinib/ 10 µM Vemurafenib/ 0.25 µM Buparlisib for 144 hours. At endpoint, *In Cell* western blot against endogenous LaminA/C was conducted to assess cell viability. Relative fluorescent intensity was measured for 4 independent wells. Bar graphs represent the mean values and standard error of the mean. p-values were calculated using two-tailed T-test statistical analysis (Graphpad).
- G) Representative Images of *In Cell* Western Blot and BLISS synergism score of various human cancer cell lines, exposed to either AZ1 or the corresponding targeted kinase inhibitors Vemurafenib, Gefitinib or Buparlisib. A375 and HT-29 cells were used as representative cell lines harbouring BRAFV600E mutations, H1650 and A431 as cell lines with EGFR mutations and HT-29 and CaSki with PIK3CA mutations. All cell lines were cultured in the presence of either control solvent (DMSO), pathway specific inhibitors (EGFR: Gefitinib; PIK3CA: Buparsilib; BRAF: Vemurafenib), AZ1 and combination thereof for 72 hours at indicated concentrations (in µM). At endpoint, *In Cell* western blot against endogenous LaminA/C was conducted to assess cell viability. Relative fluorescent intensity was measured for 4 independent wells and used to calculate the Synergism score.

A

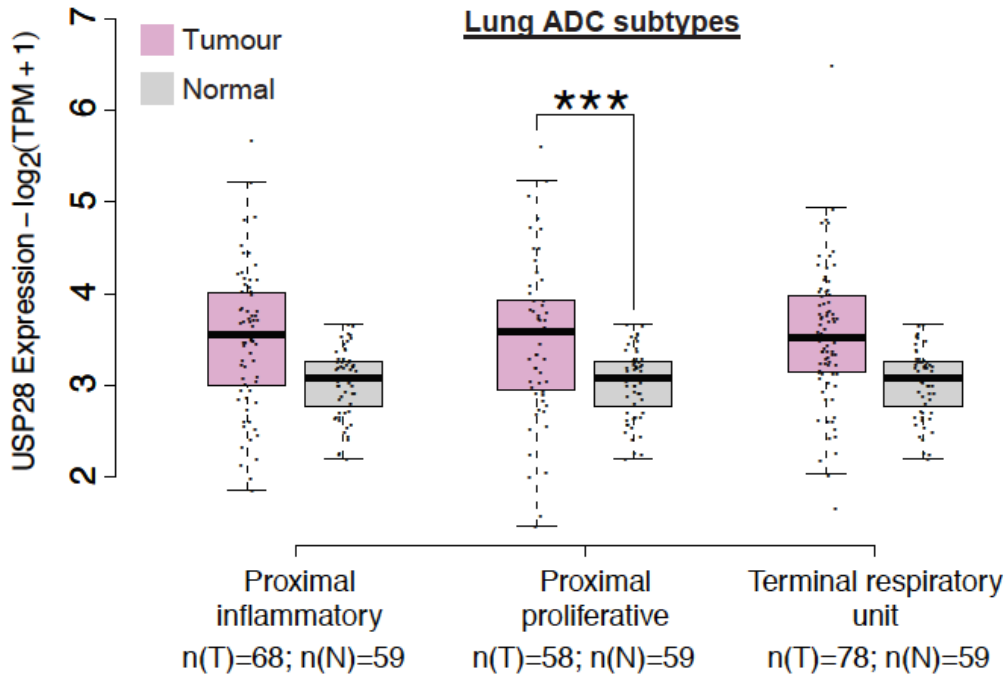

B

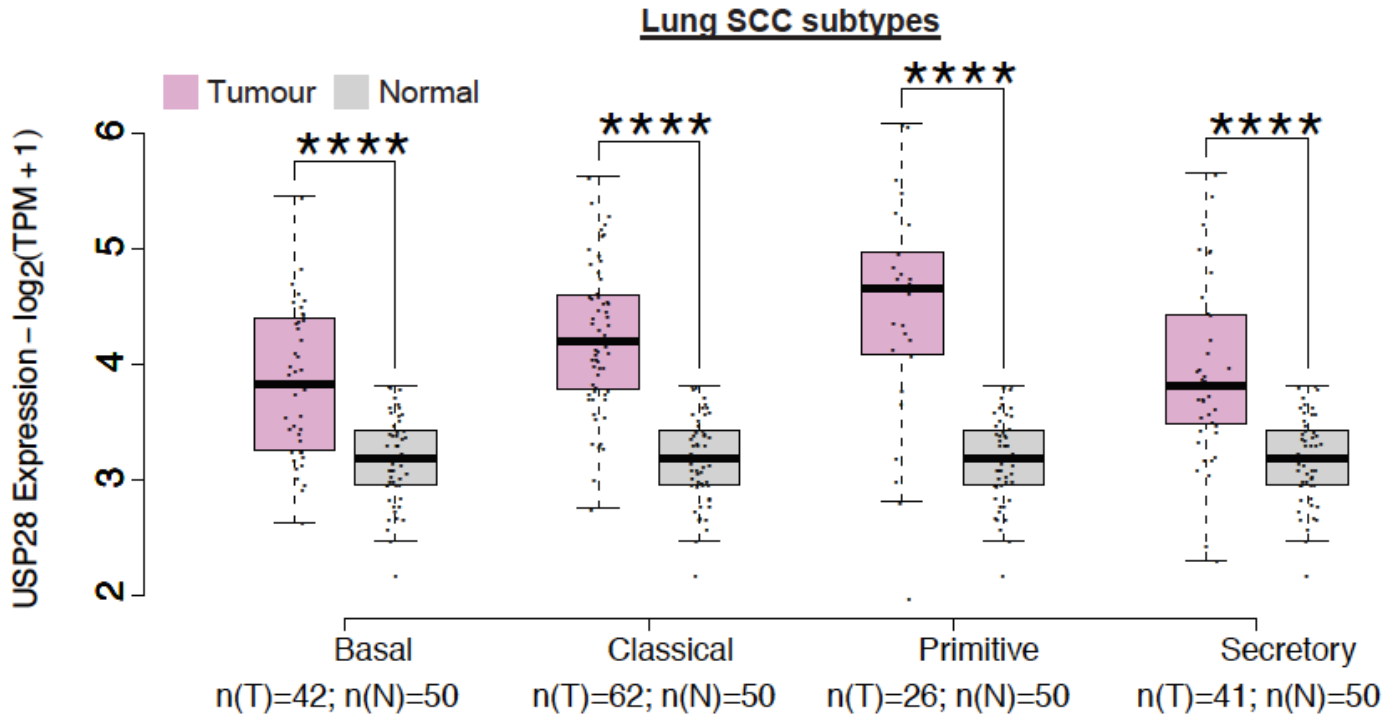

A

|       | <b>ErbB Family</b>       | <b>RAS Family</b>        | <b>PIK3 class1 Family</b> | <b>RAF Family</b>        |
|-------|--------------------------|--------------------------|---------------------------|--------------------------|
| N=501 | <b>SCC (43% altered)</b> | <b>SCC (45% altered)</b> | <b>SCC (85% altered)</b>  | <b>SCC (63% altered)</b> |
|       | EGFR 13%                 | HRAS 8%                  | PIK3CA 77%                | A-RAF 19%                |
|       | HER1 17%                 | <b>KRAS</b> 25%          | PIK3CB 35%                | <b>B-RAF</b> 28%         |
|       | HER2 13%                 | NRAS 22%                 | PIK3CD 3%                 | <b>C-RAF</b> 39%         |
|       | HER3 13%                 |                          | PIK3CG 11%                |                          |
| N=515 | <b>ADC (59% altered)</b> | <b>ADC (47% altered)</b> | <b>ADC (50% altered)</b>  | <b>ADC (51% altered)</b> |
|       | EGFR 28%                 | HRAS 8%                  | PIK3CA 29%                | A-RAF 14%                |
|       | HER1 26%                 | <b>KRAS</b> 27%          | PIK3CB 18%                | <b>B-RAF</b> 25%         |
|       | HER2 20%                 | NRAS 22%                 | PIK3CD 12%                | <b>C-RAF</b> 28%         |
|       | HER3 9%                  |                          | PIK3CG 13%                | <b>C-RAF= Down-reg.</b>  |

B

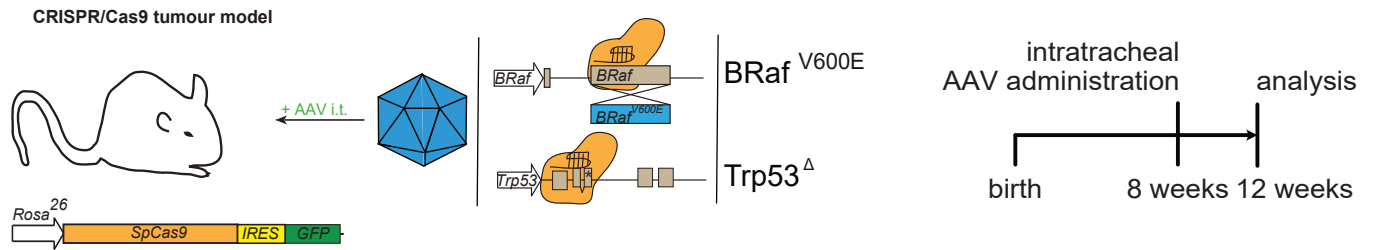

C

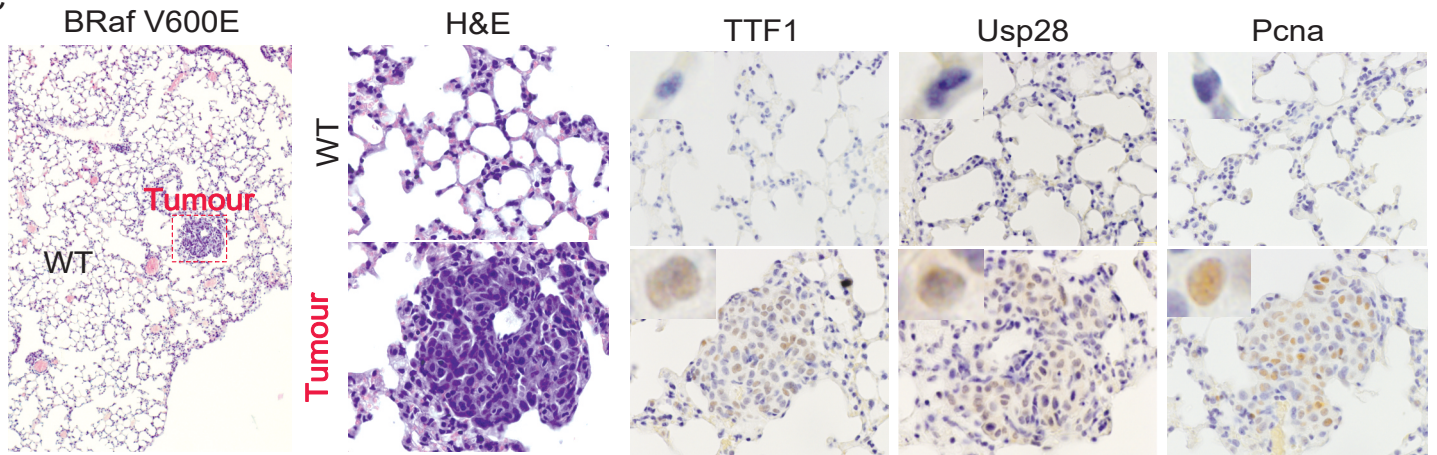

A

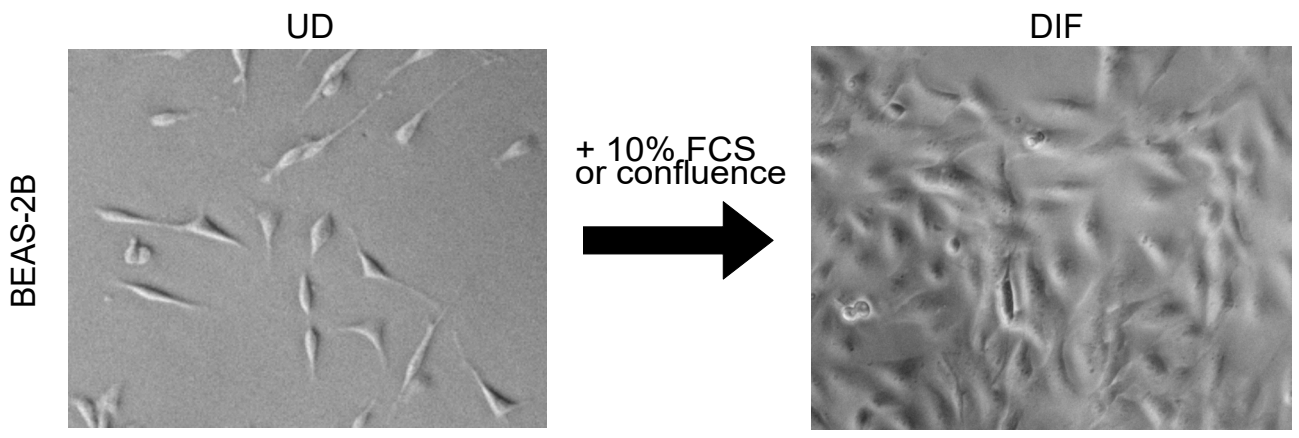

B

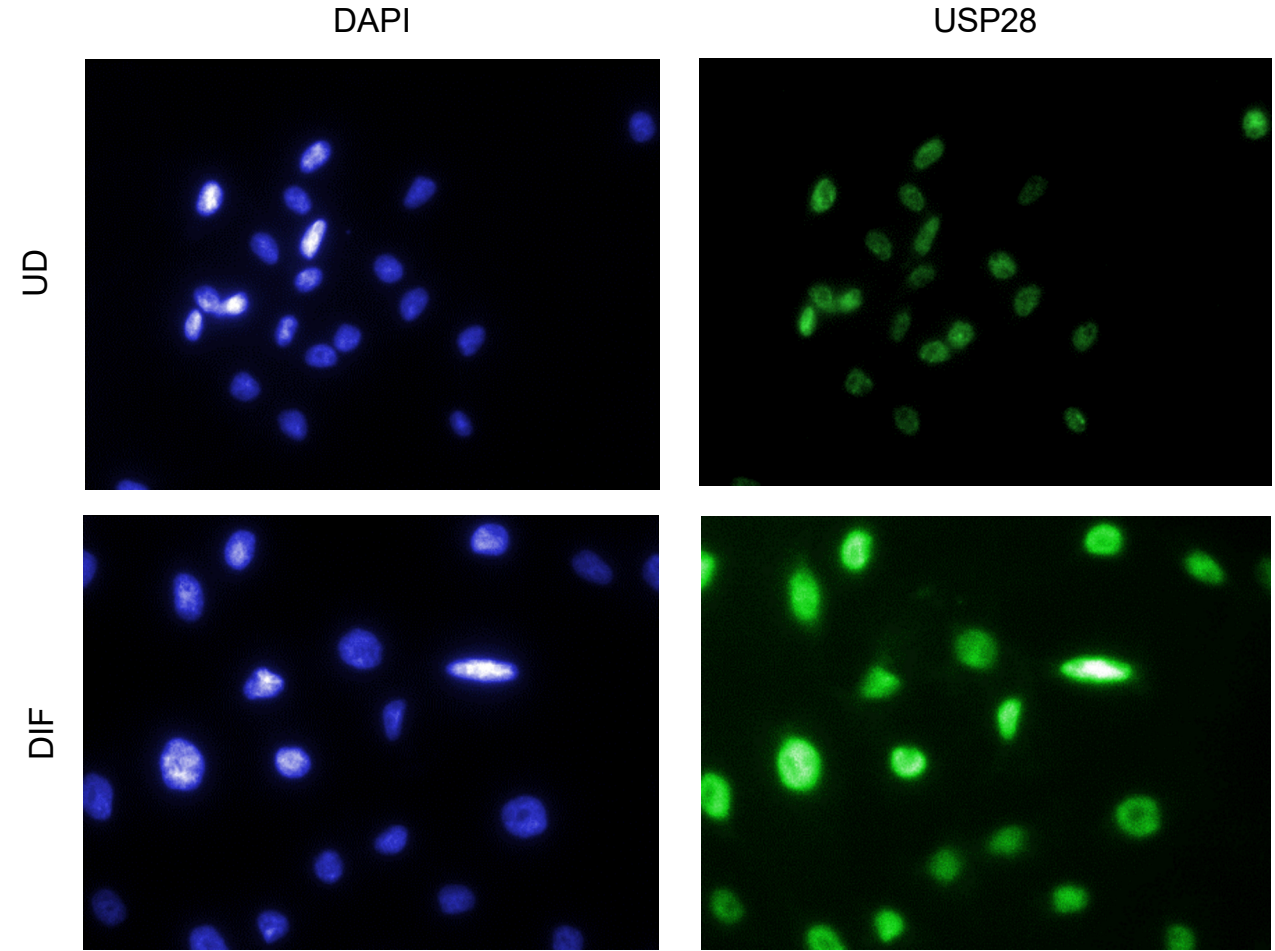

C

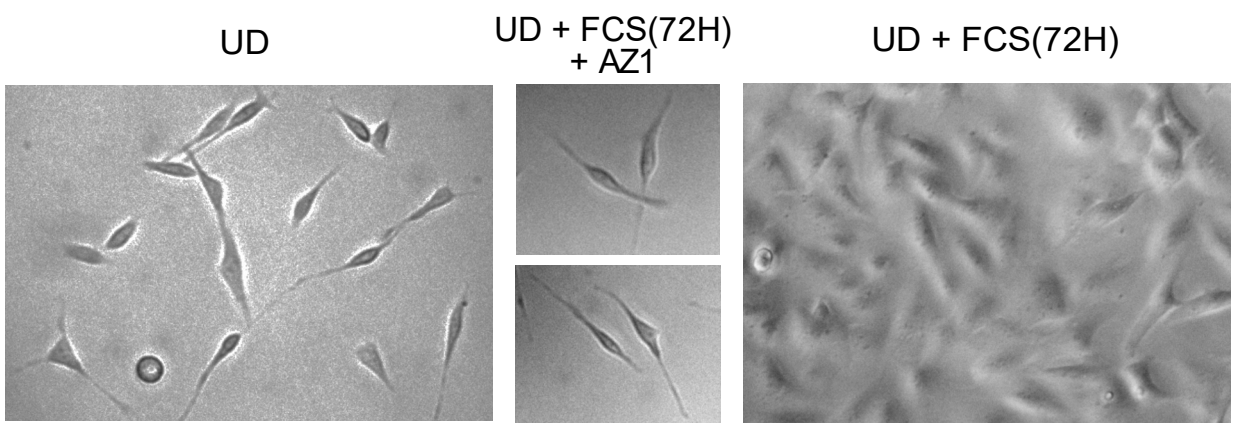

A

### RAS Family

SCC

HRAS 0.43  
KRAS 0.47  
NRAS 0.38

ADC

HRAS 0.12  
KRAS 0.36  
NRAS 0.36

SPEARMAN Correlation with USP28

B

ADC

R=0.36 p=1.1e-19

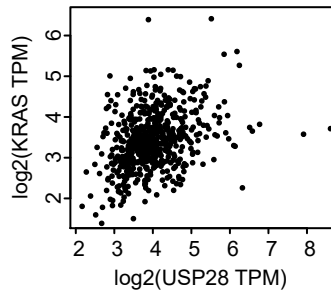

ADC

R=0.36 p=4.8e-20

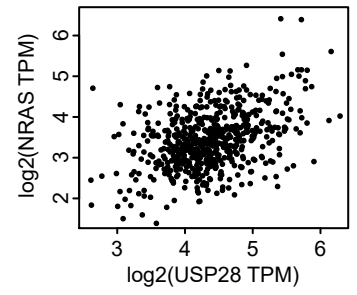

C

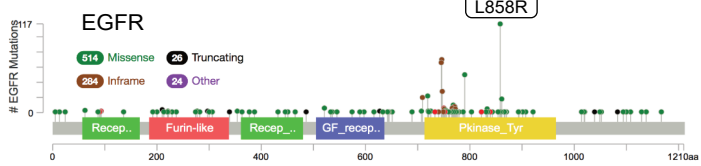

D

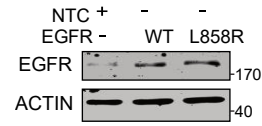

E

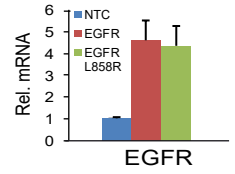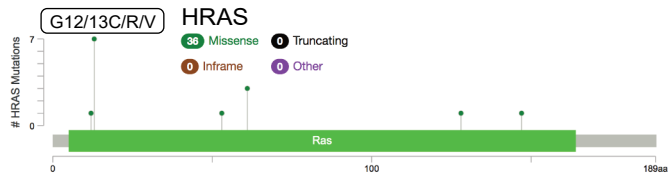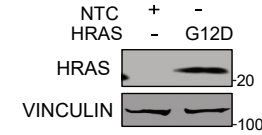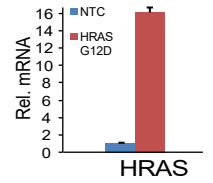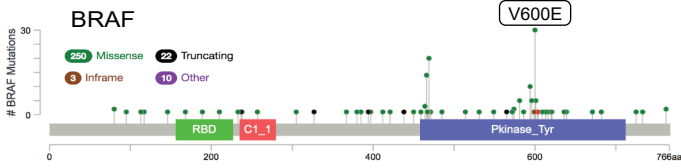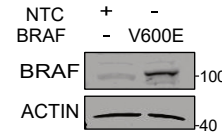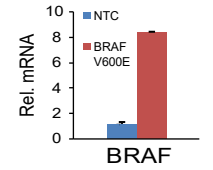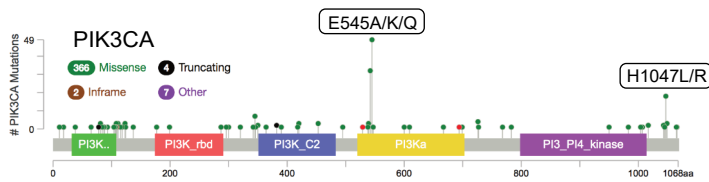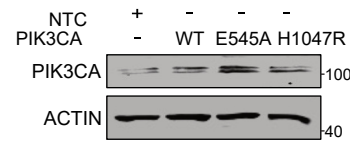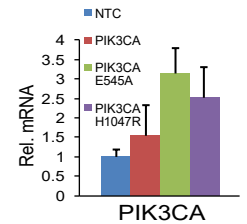



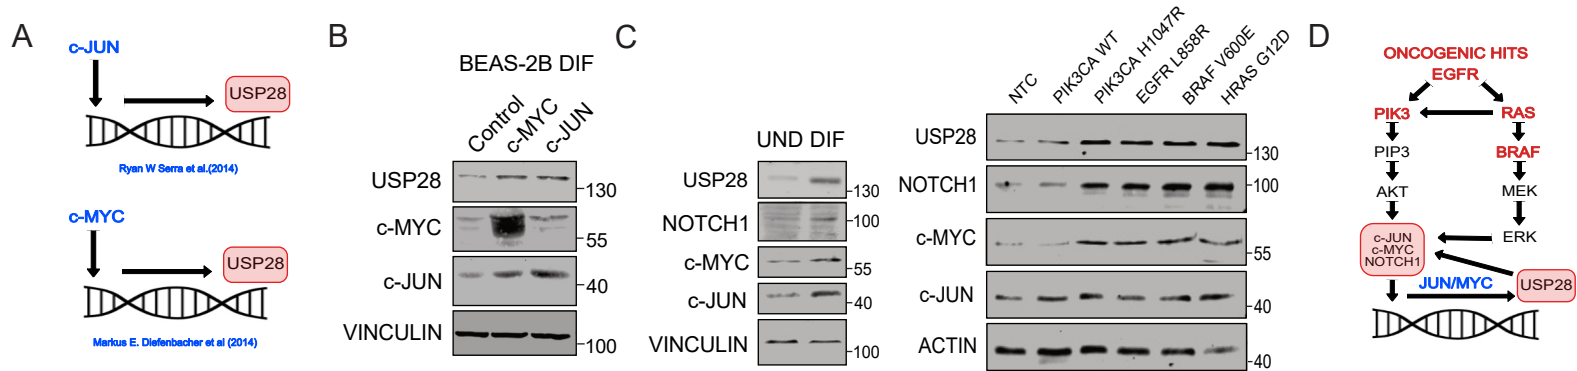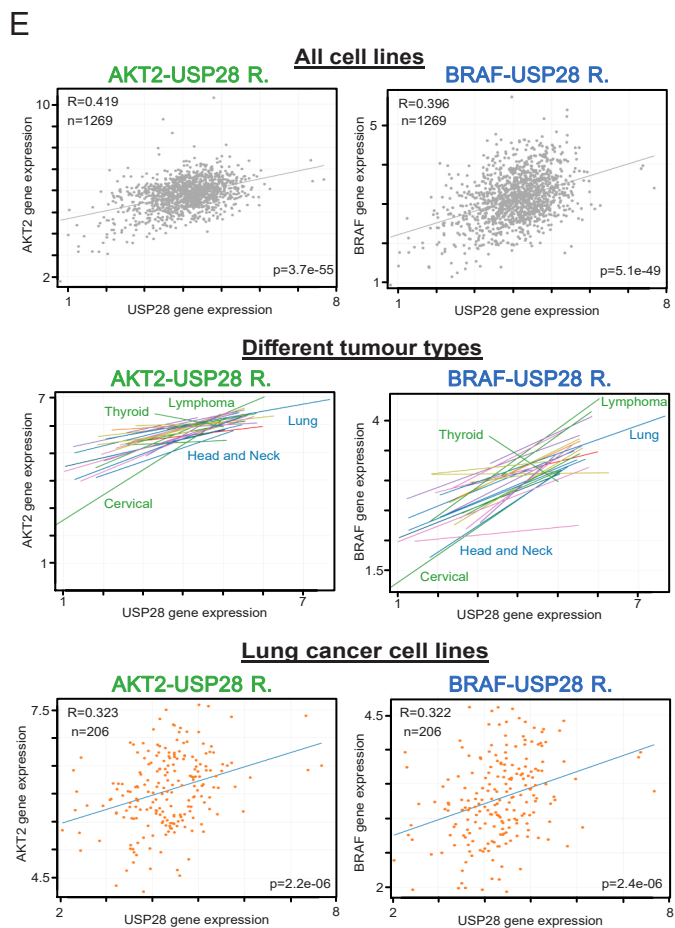

| Cell line                  | Tumour type | AKT2-USP28 R. |                |                | BRAF-USP28 R. |                |                |
|----------------------------|-------------|---------------|----------------|----------------|---------------|----------------|----------------|
|                            |             | Pearson R     | Slope          | p-value        | Pearson R     | Slope          | p-value        |
| Thyroid Cancer             |             | <b>-0.253</b> | -2.72E-1       | 4.28E-1        | <b>-0.665</b> | -4.40E-1       | 1.82E-2        |
| Skin Cancer                |             | 0.244         | 2.04E-1        | 4.34E-2        | <b>0.090</b>  | 7.03E-2        | 4.62E-1        |
| Sarcoma                    |             | 0.579         | 4.16E-1        | 2.72E-4        | 0.386         | 2.60E-1        | 2.22E-2        |
| Rhabdoid                   |             | 0.569         | 8.10E-1        | 8.78E-3        | 0.467         | 6.02E-1        | 3.78E-2        |
| Prostate Cancer            |             | 0.300         | 2.59E-1        | 5.13E-1        | 0.580         | 4.75E-1        | 1.72E-1        |
| Pancreatic Cancer          |             | 0.427         | 5.44E-1        | 1.99E-3        | 0.422         | 2.68E-1        | 2.29E-3        |
| Ovarian Cancer             |             | 0.321         | 3.50E-1        | 1.50E-2        | 0.569         | 4.00E-1        | 3.91E-6        |
| Neuroblastoma              |             | 0.550         | 4.60E-1        | 3.59E-3        | 0.342         | 3.42E-1        | 8.74E-2        |
| Myeloma                    |             | <b>0.112</b>  | 8.42E-2        | 5.56E-1        | 0.270         | 3.09E-1        | 1.48E-1        |
| Lymphoma                   |             | 0.685         | 6.06E-1        | 9.21E-12       | 0.602         | 4.84E-1        | 8.67E-9        |
| Lung Cancer                |             | <b>0.323</b>  | <b>2.54E-1</b> | <b>2.24E-6</b> | <b>0.322</b>  | <b>2.34E-1</b> | <b>2.38E-6</b> |
| Liver Cancer               |             | <b>0.068</b>  | 4.60E-2        | 7.51E-1        | <b>0.110</b>  | 8.65E-2        | 6.10E-1        |
| Liposarcoma                |             | 0.818         | 5.94E-1        | 7.00E-3        | 0.218         | 6.46E-2        | 5.73E-1        |
| Leukemia                   |             | 0.436         | 3.09E-1        | 1.14E-5        | 0.378         | 2.45E-1        | 1.72E-4        |
| Kidney Cancer              |             | 0.418         | 2.79E-1        | 1.55E-2        | 0.481         | 3.59E-1        | 4.61E-3        |
| Head and Neck Cancer       |             | 0.580         | 4.91E-1        | 8.86E-5        | 0.573         | 4.40E-1        | 1.11E-4        |
| Gastric Cancer             |             | 0.364         | 4.66E-1        | 1.95E-2        | 0.334         | 3.28E-1        | 3.30E-2        |
| Gallbladder Cancer         |             | 0.834         | 4.60E-1        | 7.89E-2        | 0.480         | 1.71E-1        | 4.13E-1        |
| Fibroblast                 |             | 0.428         | 3.06E-1        | 6.60E-3        | 0.269         | 1.63E-1        | 9.75E-2        |
| Eye Cancer                 |             | <b>0.120</b>  | 6.63E-2        | 7.98E-1        | 0.502         | 2.90E-1        | 2.51E-1        |
| Esophageal Cancer          |             | 0.385         | 3.43E-1        | 2.98E-2        | 0.409         | 2.79E-1        | 2.02E-2        |
| Endometrial/Uterine Cancer |             | 0.303         | 3.99E-1        | 9.19E-2        | 0.672         | 5.28E-1        | 2.51E-5        |
| Colon/Colorectal Cancer    |             | 0.575         | 4.52E-1        | 4.41E-7        | 0.521         | 3.37E-1        | 7.38E-6        |
| Cervical Cancer            |             | 0.935         | 9.08E-1        | 8.25E-6        | 0.760         | 4.59E-1        | 4.12E-3        |
| Breast Cancer              |             | 0.336         | 3.53E-1        | 1.15E-2        | 0.338         | 2.70E-1        | 1.08E-2        |
| Brain Cancer               |             | 0.244         | 1.69E-1        | 3.12E-2        | <b>0.009</b>  | 5.47E-3        | 9.35E-1        |
| Bone Cancer                |             | <b>0.107</b>  | 9.25E-2        | 5.36E-1        | 0.342         | 3.08E-1        | 4.09E-2        |
| Bladder Cancer             |             | 0.191         | 1.72E-1        | 2.63E-1        | 0.212         | 1.66E-1        | 2.15E-1        |
| Bile Duct Cancer           |             | 0.416         | 3.31E-1        | 1.78E-2        | 0.449         | 2.65E-1        | 9.92E-3        |

A

A-549: KRAS G12S mutant NSCLC cell line

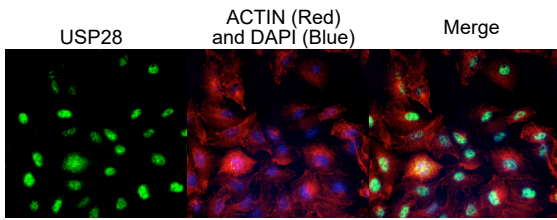

B

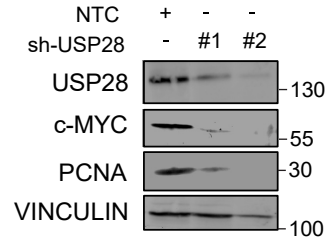

C

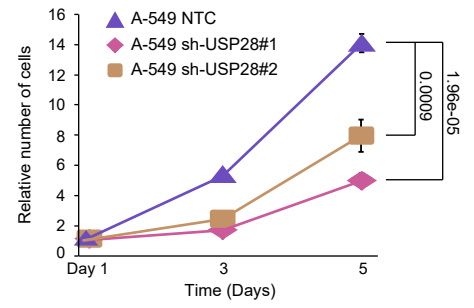

D

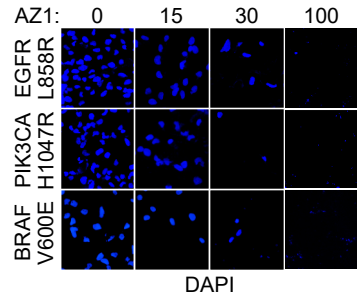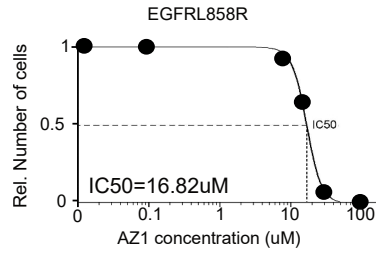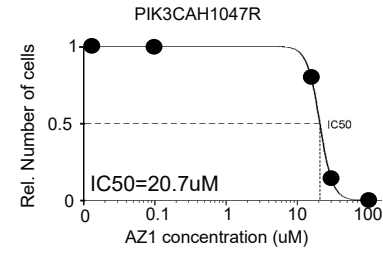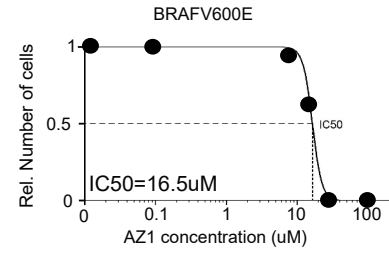

A

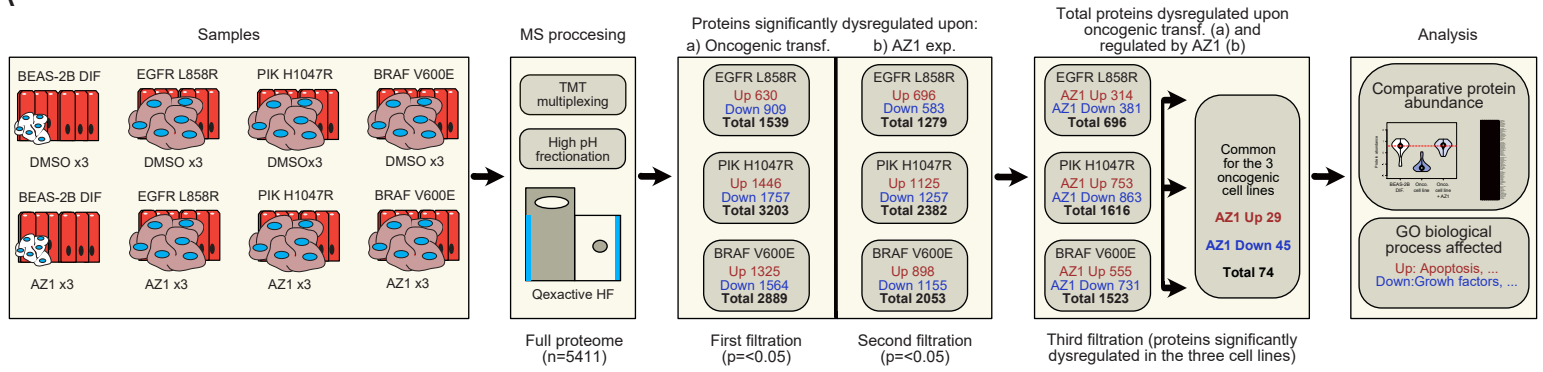

B

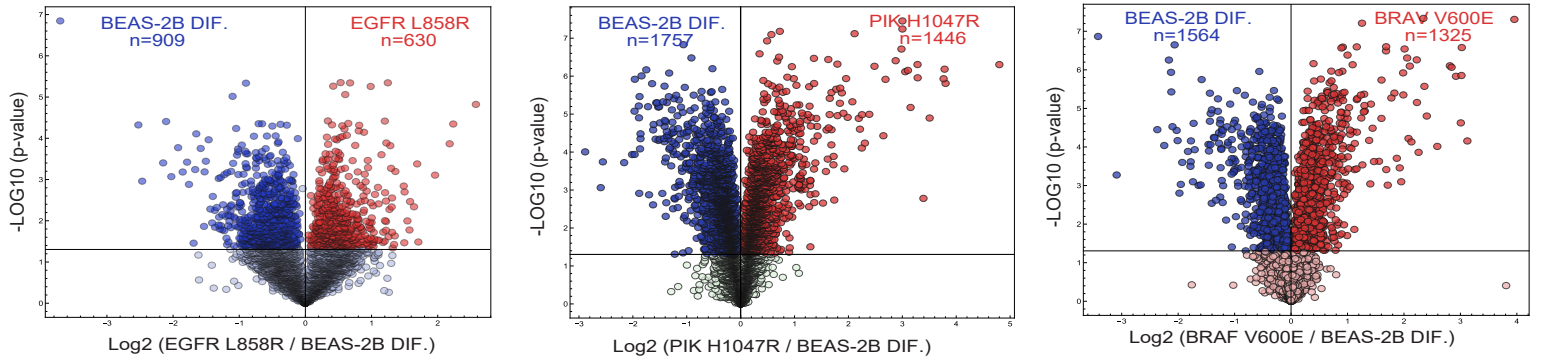

C

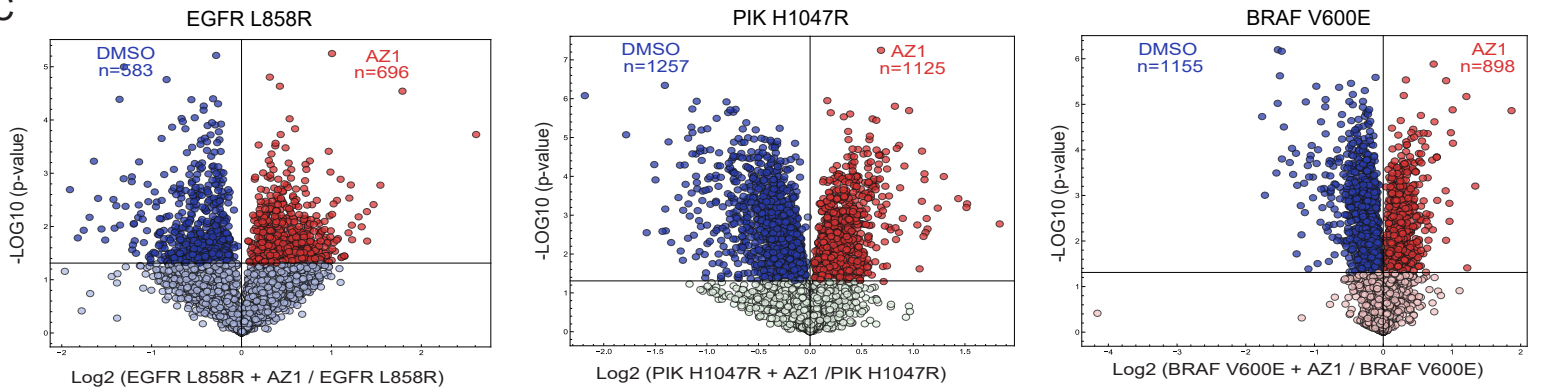

D

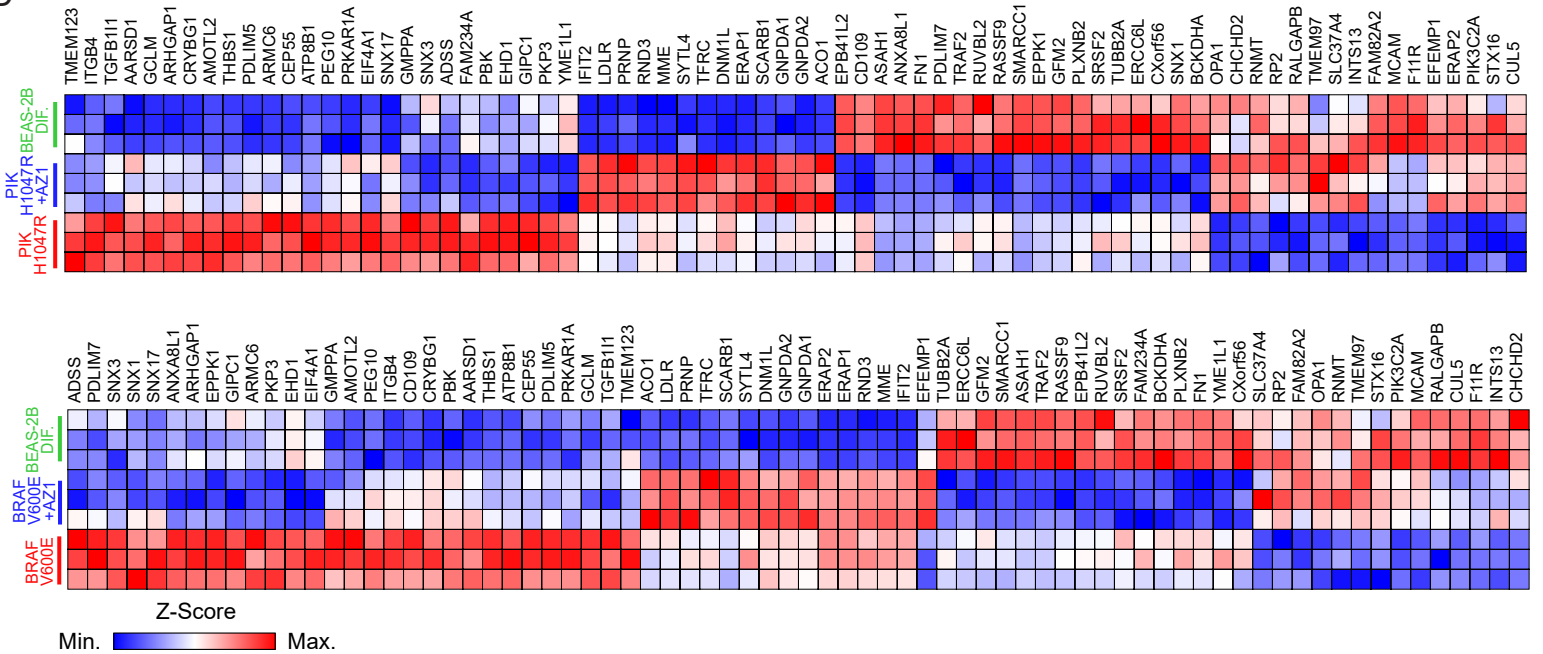

A

Overall Survival (OS) = Progression free disease (PFS) + Post progression survival (PPS)

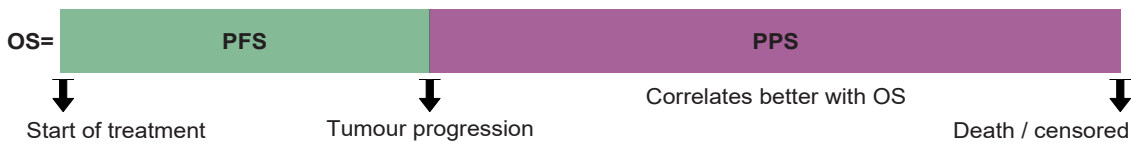

B

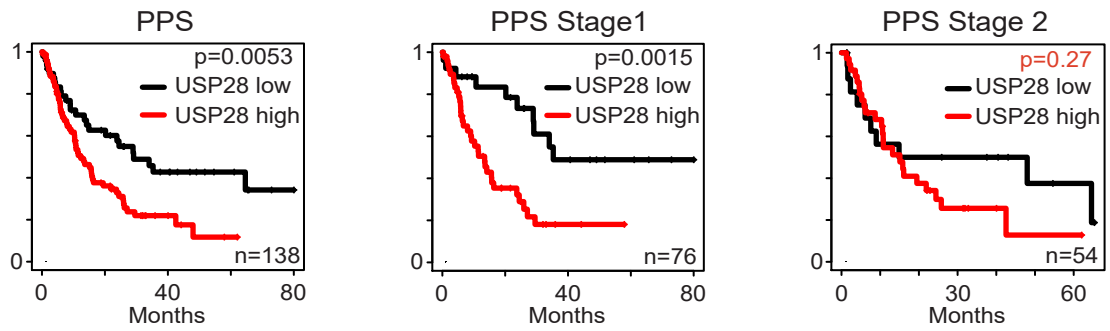

C

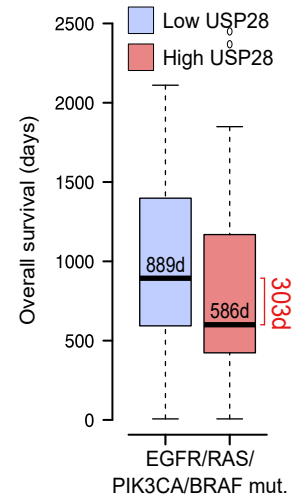

D

Median survival NSCLC patient (in days)

| Mutation Status                             | EGFR |            | RAS |        | PIK3CA |        | BRAF |            | TP53 |        |
|---------------------------------------------|------|------------|-----|--------|--------|--------|------|------------|------|--------|
|                                             | WT   | Mutant     | WT  | Mutant | WT     | Mutant | WT   | Mutant     | WT   | Mutant |
| USP28 low                                   | 728  | 1147       | 925 | 728    | 728    | 882    | 745  | 1369       | 626  | 656    |
| USP28 high                                  | 711  | 573        | 668 | 670    | 673    | 705    | 705  | 447        | 640  | 683    |
| Different in days (USP28 low vs USP28 high) | 17   | <b>574</b> | 257 | 58     | 55     | 177    | 40   | <b>922</b> | -14  | -27    |

n=1027

E

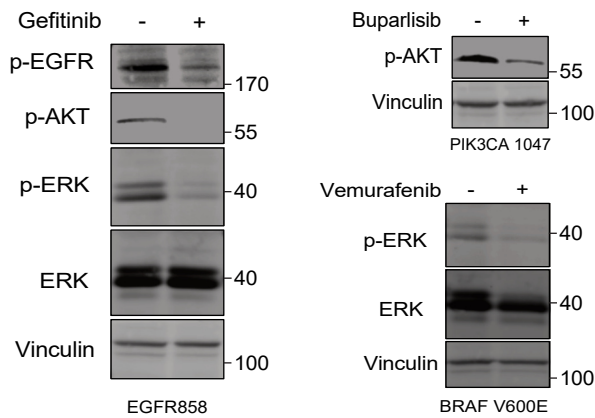

F

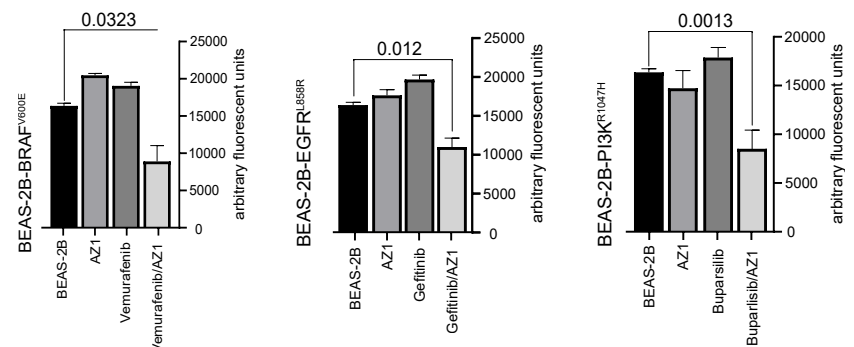

G

BRAF mutant cell lines

EGFR mutant cell lines

PIK3CA mutant cell lines

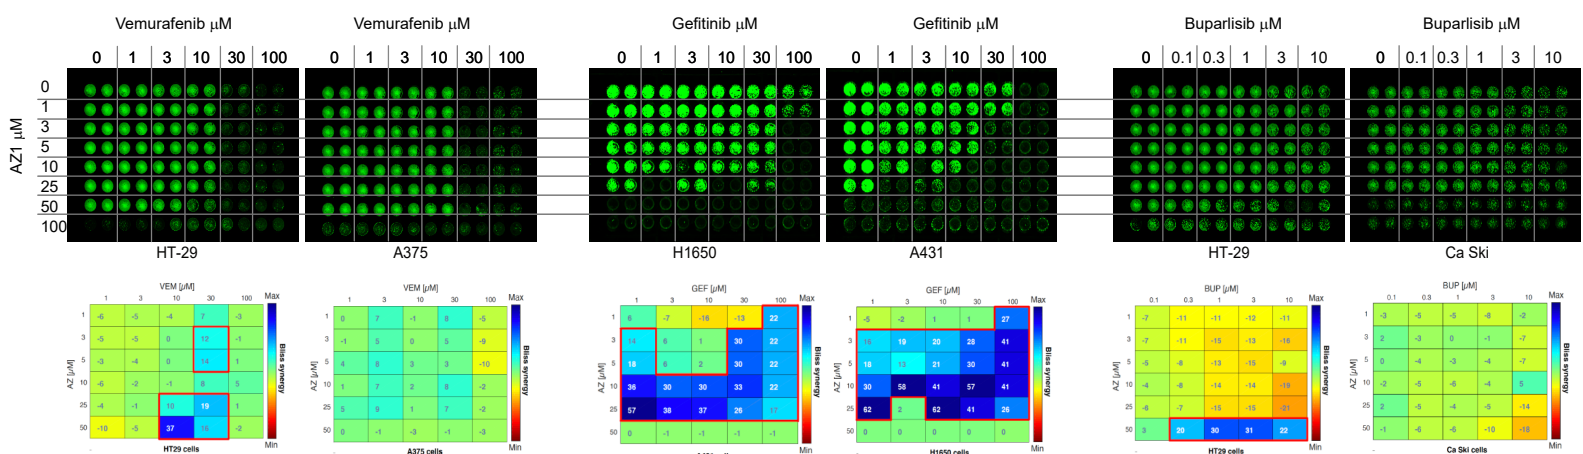

Supplement: MOL2-16-3082-s002.pdf [file MOL2-16-3082-s002.pdf]
